# Supplementary material for: CCD-Rice: a long-term paddy rice distribution dataset in China at 30 m resolution
Source: Copernicus journal article supplement (doi:10.5194/essd-17-2193-2025), 2025-05-26
Supplement: Supplementary file 1 [file essd-17-2193-2025-supplement.pdf]

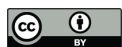

*Supplement of*

## **CCD-Rice: a long-term paddy rice distribution dataset in China at 30 m resolution**

**Ruoque Shen et al.**

*Correspondence to:* Wenping Yuan ([yuanwp@pku.edu.cn](mailto:yuanwp@pku.edu.cn))

The copyright of individual parts of the supplement might differ from the article licence.

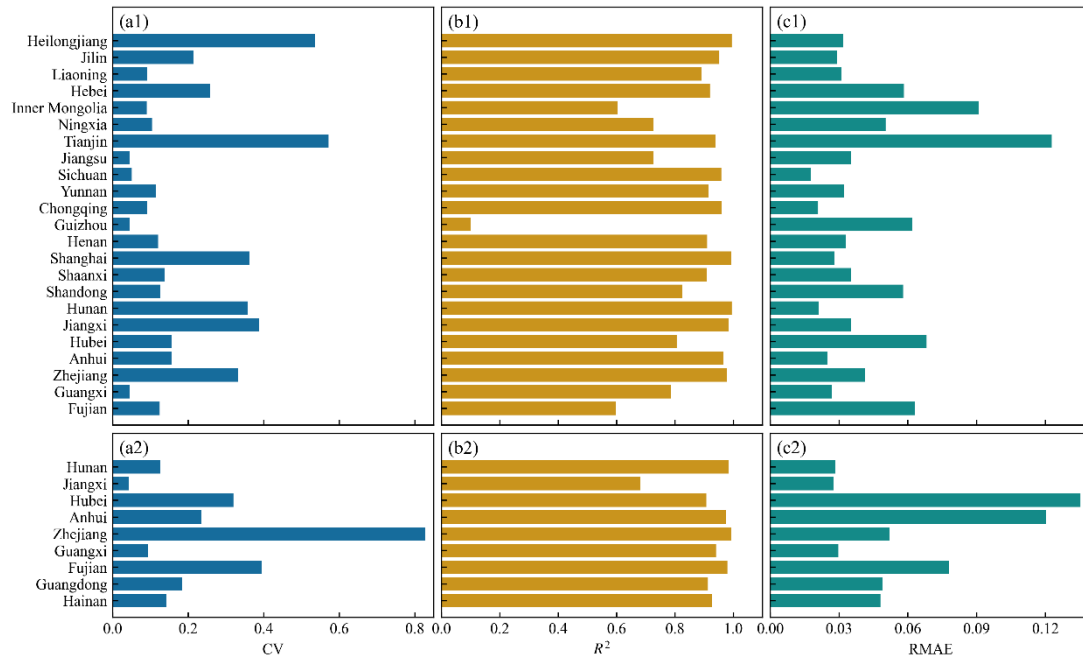

**Figure S1: Comparison of statistical and identified area at province level. Panels (a1) and (a2) show the coefficients of variation (CV) of the statistical area of single- and double-season rice in each province, respectively. Panels (b1) and (b2) show  $R^2$  values between statistical and identified area of single- and double-season rice in each province, respectively. Panels (c1) and (c2) show RMAE between statistical and identified area of single- and double-season rice in each province, respectively.**
